# Supplementary material
Source: Springer Nature journal article supplement (https://www.springermedizin.de/resource/supplementary/12879_2006_403_MOESM4_ESM.pdf/9448592)

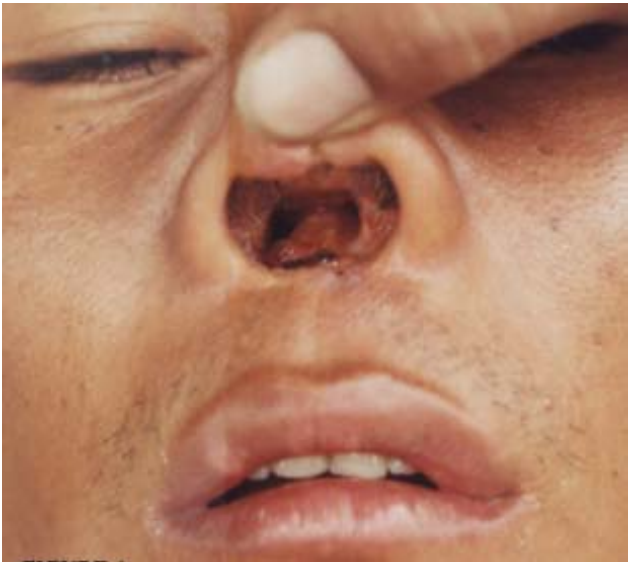

Supplement: MOESM4 [file 9448592]
